# Supplementary material for: The Transcription Factor T-Bet Is Regulated by MicroRNA-155 in Murine Anti-Viral CD8+ T Cells via SHIP-1
Source: PubMed Central journal article supplement (PMC5765282; doi:10.3389/fimmu.2017.01696), 2017-12-06
Supplement: presentation_1.pdf [file presentation_1.pdf]

**A**

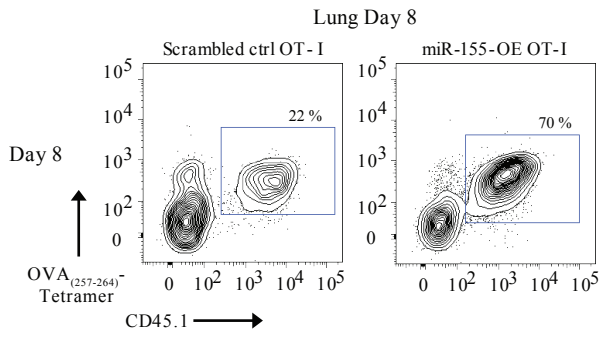

**B**

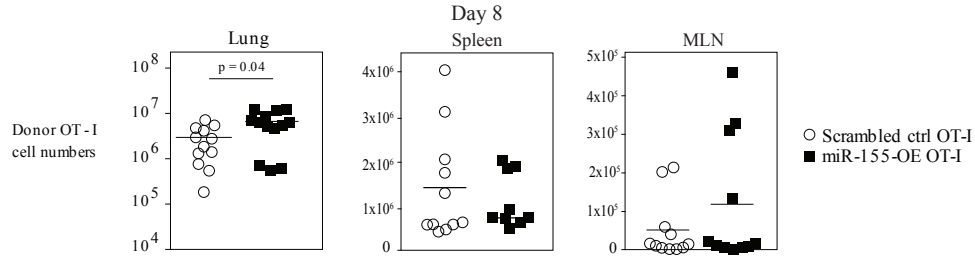

**C**

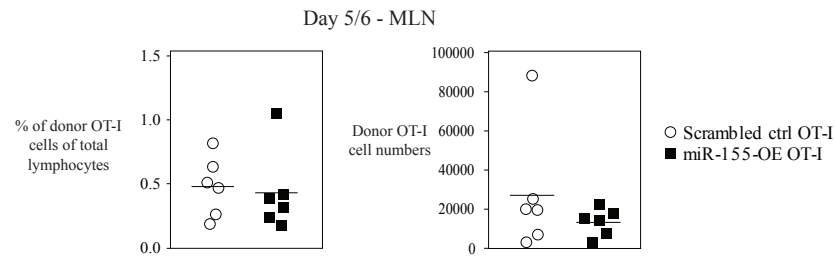

**D**

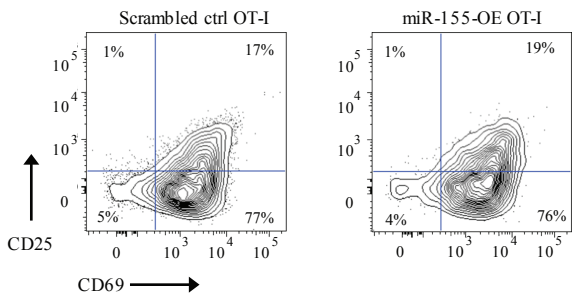

**E**

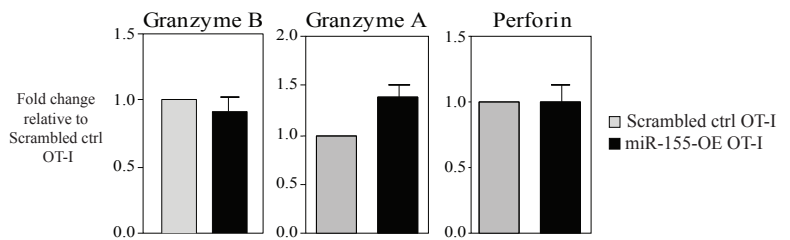

**F**

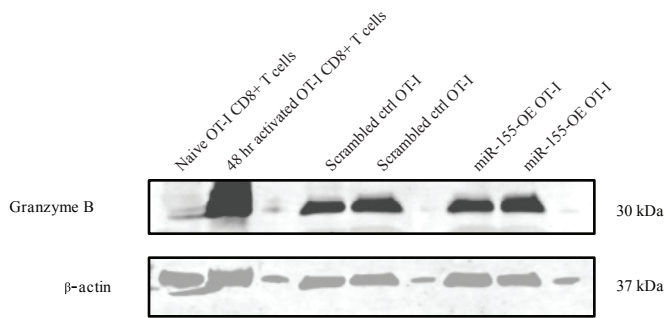

**G**

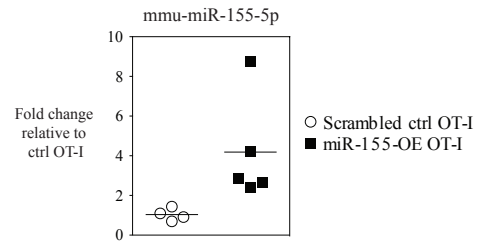

**S1. MiR-155 overexpression does not alter the activation state or cytotoxic molecules of CTL.** (A) Representative flow cytometry of lungs of CD45.2+ wild-type mice that received CD45.1+ scrambled ctrl OT-I or miR-155-OE OT-I cells. Day 8 post-influenza virus infection shown. Percentages in plots indicate the frequency of CD45.1+ and OVA<sub>(257-264)</sub>-Tetramer-specific CD8+ T cells within lymphocytes. (B) Numbers of CD45.1+ donor OT-I cells in lungs (left), spleen (center), and MLN (right) in mice 8 days post-infection. Each dot represents an individual mouse. Data is normally distributed (D'Agostino-Perason) and significance was assessed using an unpaired *t*-test. At least 9 animals per group, from at least three independent experiments. (C) Frequency (left) and number (right) of CD45.1+ donor OT-I cells in the MLN of CD45.2+ wild-type mice days 5-6 post infection with WSN-OVA influenza virus. Data from two experiments. (D) Representative flow cytometry of CD25 and CD69 expression on donor OT-I cells at 10 days post-infection with influenza virus. Representative of at least 9 animals per group, at least three independent experiments. (E) RT-PCR analysis of granzyme B, granzyme A, and perforin mRNA expression in donor OT-I cells sorted from the lungs of recipient mice 9 days post-infection with influenza virus. Scrambled ctrl OT-I values represent a pooling of 3 mice. miR-155-OE OT-I values representative of 5 mice. (F) Western blot analysis of granzyme B in sorted donor OT-I cells as in (E). Representative of two independent experiments with four mice per group. (G) RT-PCR analysis of mature mmu-miR-155-5p RNA expression in donor OT-I cells sorted from the lungs of recipient mice 9 days post-infection with influenza virus. Each dot represents an individual mouse. N =4 animals per group, two independent experiments.

A

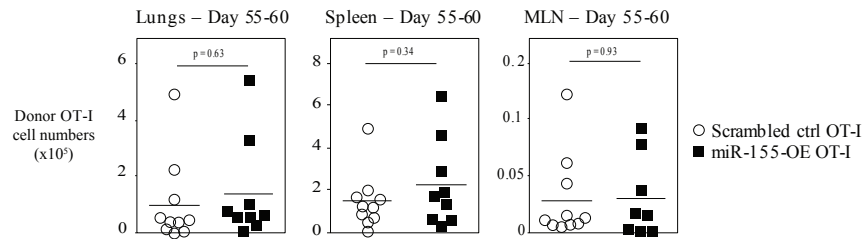

B

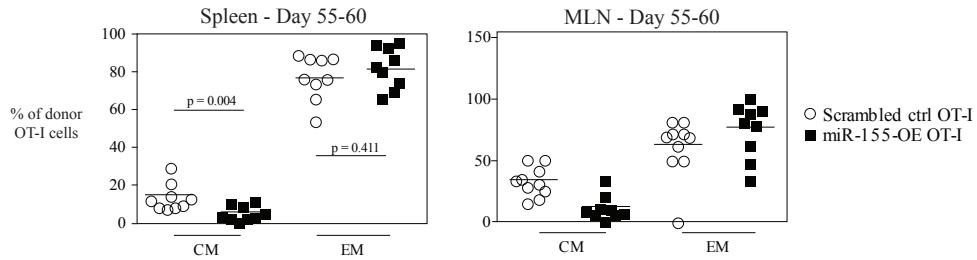

C

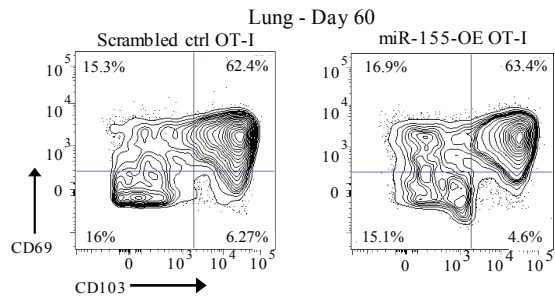

D

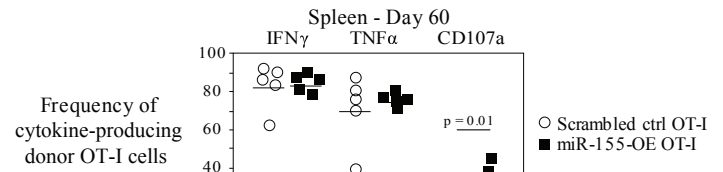

**S2. MiR-155 overexpression does not increase memory CTL numbers.** (A) Absolute number of donor OT-I cells in the lungs (left), spleens (center), or MLN (right) of recipient mice 55-60 days post-infection with WSN-OVA. Each dot represents an individual mouse, at least 8 mice per group, data from at least 3 independent experiments. Data is normally distributed (D'Agostino-Pearson) and significance was assessed using an unpaired *t*-test. (B) Dot plot indicating the frequency of CM (CD44+CD62L+) and EM (CD44+CD62L-) donor OT-I cells in the spleens (left) and MLN (right) of recipient mice 55-60 days post-infection with WSN-OVA influenza virus. Each dot represents an individual mouse, 9 animals per group from three independent experiments. EM populations are normally distributed; CM populations are not. Significance was assessed using either an unpaired *t*-test (EM) or Mann-Whitney exact test (CM). (C) Flow cytometry showing the frequency of T<sub>RM</sub> populations in the lungs of recipient mice 60 days post-influenza infection. Pre-gated on CD8+CD45.1+ lymphocytes. Representative of two independent experiments. (D) Dot plot of the frequency of IFN $\gamma$ -producing, TNF $\alpha$ -producing, or CD107a-expressing donor OT-I cells in the spleens of recipient mice 60 days post-infection with WSN-OVA. 5 mice per group from two independent experiments. Data is normally distributed (Shapiro-Wilk) and significance was assessed using an unpaired *t*-test.

A

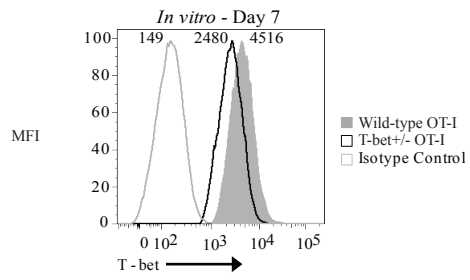

B

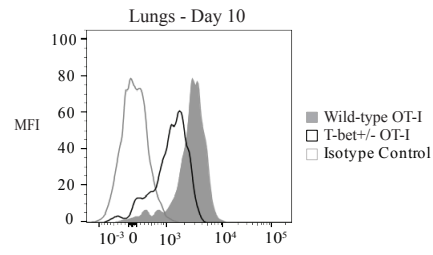

C

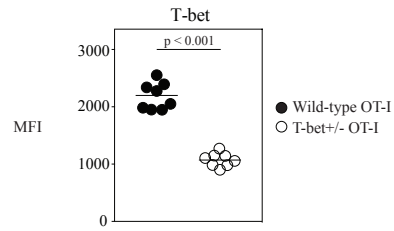

D

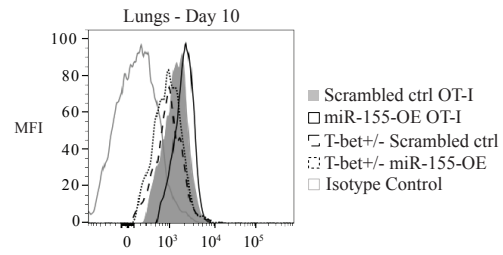

E

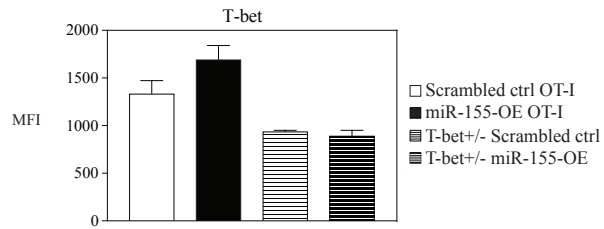

**S3. Validation of T-bet intracellular flow cytometry staining.** (A) Representative histogram of T-bet expression levels in wild-type OT-I and T-bet<sup>+/-</sup> OT-I CD8<sup>+</sup> T cells activated *in vitro* for 7 days. Numbers reflect T-bet MFI. (B) Representative histogram of T-bet expression in donor wild-type OT-I and T-bet<sup>+/-</sup> OT-I CD8<sup>+</sup> T cells from the lungs of WSN-OVA influenza virus infected animals 10 days post-infection. (C) Dot plot of T-bet expression (MFI) of donor wild-type OT-I and T-bet<sup>+/-</sup> OT-I cells in lungs 10 days post-infection. 8 animals per group from three independent experiments. Data is normally distributed (D'Agostino-Pearson) and significance was assessed using an unpaired *t*-test. (D) Representative histogram of T-bet expression in donor scrambled ctrl OT-I, miR-155-OE OT-I, T-bet<sup>+/-</sup> scrambled ctrl OT-I, and T-bet<sup>+/-</sup> miR-155-OE OT-I compared to isotype control from the lungs of WSN-OVA influenza virus infected animals 10 days post-infection. (E) Representative bar graph of T-bet expression (MFI) of donor OT-I cells in lungs 10 days post-infection.
